# Supplementary material
Source: ML conference proceedings conference paper supplement (https://openaccess.thecvf.com/content/cvpr_2015/html/Lee_Real-Time_Joint_Estimation_2015_CVPR_paper.html)
Supplement: Supplementary file 1 [file Lee_Real-Time_Joint_Estimation_2015_CVPR_supplemental.zip]

Archive with 2 entries (2 files):
- 1623-supp.mp4
- 1623-supp.pdf
