# Supplementary material
Source: ML conference proceedings conference paper supplement (https://openaccess.thecvf.com/content/cvpr_2015/html/Lee_Real-Time_Joint_Estimation_2015_CVPR_paper.html)
Supplement: Supplementary file 1 [file Lee_Real-Time_Joint_Estimation_2015_CVPR_supplemental.zip › 1623-supp.pdf]

# Real-time Joint Estimation of Camera Orientation and Vanishing Points: Supplementary Material

Jeong-Kyun Lee and Kuk-Jin Yoon  
Computer Vision Laboratory  
Gwangju Institute of Science and Technology  
{leejk, kjyoon}@gist.ac.kr

## 1. Introduction

The proposed method has been developed based on nonlinear Bayesian filtering, and, in the implementation, we utilized the extended Kalman filter (EKF) [1]. In this supplementary material, we provide the detailed derivations of the proposed method, including the derivations of the jacobians of the proposed nonlinear system models.

## 2. State

In the proposed system, the state vector  $\mathbf{x}$  is defined by

$$\begin{aligned}\mathbf{x} &= [\mathbf{x}_v^T \mathbf{y}_1^T \mathbf{y}_2^T \cdots]^T \\ &= [\mathbf{q}_{WC}^T \omega_C^T \mathbf{y}_1^T \mathbf{y}_2^T \cdots]^T,\end{aligned}\quad (1)$$

where  $\mathbf{q}_{WC} = [q_1, q_2, q_3, q_4]^T$  denotes a quaternion for the current camera orientation,  $\omega_C$  an angular velocity, and  $\mathbf{y}_i = [\theta_i, \phi_i]^T$  a vanishing direction (VD).

## 3. Camera Motion Model

Since we aim at estimating the camera orientation in an image sequence, we assume a constant angular velocity model as the camera motion model. The model function is defined as

$$\mathbf{f}_v = \begin{bmatrix} \mathbf{q}_{WC}^{new} \\ \omega_C^{new} \end{bmatrix} = \begin{bmatrix} \mathbf{q}_{WC}^{old} \times \mathbf{q}((\omega_C^{old} + \boldsymbol{\Omega})\Delta t) \\ \omega_C^{old} + \boldsymbol{\Omega} \end{bmatrix}, \quad (2)$$

where the quaternion for the rotation  $(\omega_C^{old} + \boldsymbol{\Omega})\Delta t$  in the axis-angle representation,  $\mathbf{q}((\omega_C^{old} + \boldsymbol{\Omega})\Delta t)$ , is as follows.

$$\mathbf{q}((\omega_C^{old} + \boldsymbol{\Omega})\Delta t) = \begin{bmatrix} \cos(\|\omega_C^{old} + \boldsymbol{\Omega}\| \frac{\Delta t}{2}) \\ \frac{\omega_C^{old} + \boldsymbol{\Omega}}{\|\omega_C^{old} + \boldsymbol{\Omega}\|} \sin(\|\omega_C^{old} + \boldsymbol{\Omega}\| \frac{\Delta t}{2}) \end{bmatrix} \quad (3)$$

The multiplication of the quaternions  $\mathbf{q}$  and  $\mathbf{p}$  is represented by

$$\mathbf{q} \times \mathbf{p} = \mathbf{Q}(\mathbf{q})\mathbf{p} = \mathbf{P}(\mathbf{p})\mathbf{q}, \quad (4)$$

where the matrix  $\mathbf{Q}(\mathbf{q})$  and  $\mathbf{P}(\mathbf{p})$  are defined by

$$\mathbf{Q}(\mathbf{q}) = \begin{bmatrix} q_1 & -q_2 & -q_3 & -q_4 \\ q_2 & q_1 & -q_4 & q_3 \\ q_3 & q_4 & q_1 & -q_2 \\ q_4 & -q_3 & q_2 & q_1 \end{bmatrix}, \quad (5)$$

$$\mathbf{P}(\mathbf{p}) = \begin{bmatrix} p_1 & -p_2 & -p_3 & -p_4 \\ p_2 & p_1 & p_4 & -p_3 \\ p_3 & -p_4 & p_1 & p_2 \\ p_4 & p_3 & -p_2 & p_1 \end{bmatrix}. \quad (6)$$

## 4. Measurement Model

The measurement model  $h_{ij}$  for the  $i$ -th VD of the state vector and the  $j$ -th line features is defined by

$$h_{ij} = \mathbf{d}_i^T \mathbf{R}(\mathbf{q}_{WC}) \mathbf{n}_{ij}. \quad (7)$$

The  $i$ -th unit VD vector  $\mathbf{d}_i$  in Cartesian coordinates is relevant to the  $i$ -th VD vector  $\mathbf{y}_i$  in spherical coordinates as

$$\mathbf{d}_i = \begin{bmatrix} x_i \\ y_i \\ z_i \end{bmatrix} = \begin{bmatrix} \cos \phi_i \cos \theta_i \\ \cos \phi_i \sin \theta_i \\ \sin \phi_i \end{bmatrix}, \quad (8)$$

$$\mathbf{y}_i = \begin{bmatrix} \theta_i \\ \phi_i \end{bmatrix} = \begin{bmatrix} \text{atan2}(y_i, x_i) \\ \text{atan2}(z_i, \sqrt{x_i^2 + y_i^2}) \end{bmatrix}, \quad (9)$$

where  $\text{atan2}$  is the arctangent function. The rotation matrix  $\mathbf{R}$  for a quaternion  $\mathbf{q}$  is calculated by

$$\mathbf{R}(\mathbf{q}) = \begin{bmatrix} q_1^2 + q_2^2 - q_3^2 - q_4^2 & 2(q_2q_3 - q_1q_4) & 2(q_2q_4 + q_1q_3) \\ 2(q_2q_3 + q_1q_4) & q_1^2 - q_2^2 + q_3^2 - q_4^2 & 2(q_3q_4 - q_1q_2) \\ 2(q_2q_4 - q_1q_3) & 2(q_3q_4 + q_1q_2) & q_1^2 - q_2^2 - q_3^2 + q_4^2 \end{bmatrix}. \quad (10)$$

## 5. Initialization

Let  $\mathbf{d}_{C,i} = [d_1, d_2, d_3]^T$  denote a VD vector in the camera coordinates and  $\mathbf{q}_{WR} = [q_1, q_2, q_3, q_4]^T$  the quaternion of the current camera orientation. Then, using Eq. (10), the VD  $\mathbf{d}_i$  is

$$\begin{aligned} \mathbf{d}_i &= \mathbf{R}(\mathbf{q}_{WC}) \mathbf{d}_{C,i} \\ &= \begin{bmatrix} q_1^2 + q_2^2 - q_3^2 - q_4^2 & 2(q_2q_3 - q_1q_4) & 2(q_2q_4 + q_1q_3) \\ 2(q_2q_3 + q_1q_4) & q_1^2 - q_2^2 + q_3^2 - q_4^2 & 2(q_3q_4 - q_1q_2) \\ 2(q_2q_4 - q_1q_3) & 2(q_3q_4 + q_1q_2) & q_1^2 - q_2^2 - q_3^2 + q_4^2 \end{bmatrix} \begin{bmatrix} d_1 \\ d_2 \\ d_3 \end{bmatrix}. \end{aligned} \quad (11)$$

Eq. (11) is used to compute the covariance of a new VD,  $\mathbf{P}_{\mathbf{y}_{new}}$ . The covariance  $\mathbf{P}_{\mathbf{y}_{new}}$  is defined as

$$\mathbf{P}_{\mathbf{y}_{new}} = \frac{\partial \mathbf{y}_{new}}{\partial \mathbf{x}_v} \mathbf{P}_{\mathbf{x}_v} \frac{\partial \mathbf{y}_{new}}{\partial \mathbf{x}_v}^T + \tilde{\mathbf{P}}_{\mathbf{y}_{new}}. \quad (12)$$

In Eq. (12), the covariances  $\mathbf{P}_{\mathbf{x}_v}$  and  $\tilde{\mathbf{P}}_{\mathbf{y}_{new}}$  are already known. Therefore, one needs to compute just the jacobian  $\frac{\partial \mathbf{y}_{new}}{\partial \mathbf{x}_v}$ . From Eq. (8), (9), and (11), the jacobian is derived as

$$\frac{\partial \mathbf{y}_{new}}{\partial \mathbf{x}_v} = \frac{\partial \mathbf{y}_{new}}{\partial \mathbf{d}_i} \frac{\partial \mathbf{d}_i}{\partial \mathbf{x}_v} \quad (13)$$

The left jacobian of the right term of Eq. (13) is derived from Eq. (9), as follows.

$$\frac{\partial \mathbf{y}_{new}}{\partial \mathbf{d}_i} = \begin{bmatrix} -\frac{y_i}{x_i^2 + y_i^2} & \frac{x_i}{x_i^2 + y_i^2} & 0 \\ -\frac{z_i}{x_i^2 + y_i^2 + z_i^2} \frac{x_i}{\sqrt{x_i^2 + y_i^2}} & -\frac{z_i}{x_i^2 + y_i^2 + z_i^2} \frac{y_i}{\sqrt{x_i^2 + y_i^2}} & \frac{\sqrt{x_i^2 + y_i^2}}{x_i^2 + y_i^2 + z_i^2} \end{bmatrix} \quad (14)$$

The right jacobian of the right term of Eq. (13) is derived from Eq. (11), as

$$\frac{\partial \mathbf{d}_i}{\partial \mathbf{x}_v} = \begin{bmatrix} \frac{\partial \mathbf{d}_i}{\partial \mathbf{q}_{WC}} & \frac{\partial \mathbf{d}_i}{\partial \omega_C} \end{bmatrix}, \quad (15)$$

where the right jacobian of the right term of Eq. (15) is set to a  $3 \times 3$  zero matrix and the left jacobian of the right term of Eq. (15) can be derived as follows.

$$\frac{\partial \mathbf{d}_i}{\partial \mathbf{q}_{WC}} = \begin{bmatrix} 2q_1d_1 - 2q_4d_2 + 2q_3d_3 & 2q_2d_1 + 2q_3d_2 + 2q_4d_3 & 2q_3d_1 + 2q_2d_2 + 2q_1d_3 & 2q_4d_1 - 2q_1d_2 + 2q_2d_3 \\ 2q_4d_1 + 2q_1d_2 - 2q_2d_3 & 2q_3d_1 - 2q_2d_2 - 2q_1d_3 & 2q_2d_1 + 2q_3d_2 + 2q_4d_3 & 2q_1d_1 - 2q_4d_2 + 2q_3d_3 \\ -2q_3d_1 + 2q_2d_2 + 2q_4d_3 & 2q_4d_1 + 2q_3d_2 - 2q_2d_3 & -2q_1d_1 + 2q_4d_2 - 2q_3d_3 & 2q_1d_1 + 2q_3d_2 + 2q_4d_3 \end{bmatrix} \quad (16)$$

## 6. Prediction Step

In the prediction step of the EKF system, an estimate of the current state is produced from Eq. (2), and the current covariance  $\hat{\mathbf{P}}$  is estimated by

$$\hat{\mathbf{P}} = \begin{bmatrix} \frac{\partial \mathbf{f}_v}{\partial \mathbf{x}_v} \mathbf{P}_{\mathbf{x}_v} \frac{\partial \mathbf{f}_v}{\partial \mathbf{x}_v}^T + \frac{\partial \mathbf{f}_v}{\partial \Omega} \mathbf{P}_\Omega \frac{\partial \mathbf{f}_v}{\partial \Omega}^T & \frac{\partial \mathbf{f}_v}{\partial \mathbf{x}_v} \mathbf{P}_{\mathbf{x}_v \mathbf{y}} \\ \mathbf{P}_{\mathbf{y} \mathbf{x}_v} \frac{\partial \mathbf{f}_v}{\partial \mathbf{x}_v}^T & \mathbf{P}_{\mathbf{y}} \end{bmatrix}, \quad (17)$$

where  $\mathbf{P}_\Omega$  is a covariance of the noise  $\Omega$  of the motion model,  $\mathbf{P}_{\mathbf{x}_v \mathbf{y}}$  and  $\mathbf{P}_{\mathbf{y} \mathbf{x}_v}$  are covariances for the camera orientation and the VDs, and  $\mathbf{P}_{\mathbf{y}}$  is the covariance of the VDs. Unlike that the covariances are already known, the two jacobians  $\frac{\partial \mathbf{f}_v}{\partial \mathbf{x}_v}$  and  $\frac{\partial \mathbf{f}_v}{\partial \Omega}$  should be computed. First, the jacobian of the camera motion model for the camera state,  $\frac{\partial \mathbf{f}_v}{\partial \mathbf{x}_v}$ , is derived from Eq. (2) as

$$\frac{\partial \mathbf{f}_v}{\partial \mathbf{x}_v} = \begin{bmatrix} \frac{\partial \mathbf{q}_{WC}^{new}}{\partial \mathbf{q}_{WC}^{old}} & \frac{\partial \mathbf{q}_{WC}^{new}}{\partial \omega_C^{old}} \\ \frac{\partial \omega_C^{new}}{\partial \mathbf{q}_{WC}^{old}} & \frac{\partial \omega_C^{new}}{\partial \omega_C^{old}} \end{bmatrix} = \begin{bmatrix} \frac{\partial \mathbf{q}_{WC}^{new}}{\partial \mathbf{q}_{WC}^{old}} & \frac{\partial \mathbf{q}_{WC}^{new}}{\partial \omega_C^{old}} \\ \mathbf{0}_{3 \times 4} & \mathbf{I}_3 \end{bmatrix}, \quad (18)$$

where  $\mathbf{0}_{3 \times 4}$  is a  $3 \times 4$  zero matrix, and  $\mathbf{I}_3$  is a  $3 \times 3$  identity matrix. Here, the jacobian of the new camera orientation for the old camera orientation,  $\frac{\partial \mathbf{q}_{WC}^{new}}{\partial \mathbf{q}_{WC}^{old}}$ , is easily derived using Eq. (6), as follows.

$$\frac{\partial \mathbf{q}_{WC}^{new}}{\partial \mathbf{q}_{WC}^{old}} = \mathbf{P}(\mathbf{q}((\omega_C^{old} + \Omega) \Delta t)) \mathbf{I}_4 \quad (19)$$

Let  $\omega_C^{old} = [w_1, w_2, w_3]^T$ . Then, the jacobian  $\frac{\partial \mathbf{q}_{WC}^{new}}{\partial \omega_C^{old}}$  is derived as

$$\frac{\partial \mathbf{q}_{WC}^{new}}{\partial \omega_C^{old}} = \mathbf{Q}(\mathbf{q}_{WC}^{old}) \begin{bmatrix} m(\omega_C^{old}, \Delta t, 1) & m(\omega_C^{old}, \Delta t, 2) & m(\omega_C^{old}, \Delta t, 3) \\ n(\omega_C^{old}, \Delta t, 1) & n(\omega_C^{old}, \Delta t, 2) & n(\omega_C^{old}, \Delta t, 3) \\ o(\omega_C^{old}, \Delta t, 2, 1) & o(\omega_C^{old}, \Delta t, 2, 2) & o(\omega_C^{old}, \Delta t, 2, 3) \\ o(\omega_C^{old}, \Delta t, 3, 1) & o(\omega_C^{old}, \Delta t, 3, 2) & o(\omega_C^{old}, \Delta t, 3, 3) \end{bmatrix}, \quad (20)$$

where

$$m(\omega_C^{old}, \Delta t, i) = -\frac{w_i}{\|\omega_C^{old}\|} \sin\left(\frac{\|\omega_C^{old}\| \Delta t}{2}\right) \frac{\Delta t}{2}, \quad (21)$$

$$n(\omega_C^{old}, \Delta t, i) = \frac{\|\omega_C^{old}\| - w_i^2 / \|\omega_C^{old}\|}{\|\omega_C^{old}\|^2} \sin\left(\frac{\|\omega_C^{old}\| \Delta t}{2}\right) + \frac{w_i^2}{\|\omega_C^{old}\|^2} \cos\left(\frac{\|\omega_C^{old}\| \Delta t}{2}\right) \frac{\Delta t}{2}, \quad (22)$$

$$o(\omega_C^{old}, \Delta t, i, j) = -\frac{w_i w_j}{\|\omega_C^{old}\|^3} \sin\left(\frac{\|\omega_C^{old}\| \Delta t}{2}\right) + \frac{w_i w_j}{\|\omega_C^{old}\|^2} \cos\left(\frac{\|\omega_C^{old}\| \Delta t}{2}\right) \frac{\Delta t}{2}. \quad (23)$$

In addition, the jacobian  $\frac{\partial \mathbf{f}_v}{\partial \Omega}$  can be derived in a manner similar to the derivation of Eq. (18).

## 7. Update Step

In the update step of the EKF system, the computation of the jacobian of the measurement model for the camera state,  $\frac{\partial h_{ij}}{\partial \mathbf{x}_v}$ , is required for correcting the estimate. The jacobian is represented as

$$\frac{\partial h_{ij}}{\partial \mathbf{x}_v} = \begin{bmatrix} \frac{\partial h_{ij}}{\partial \mathbf{q}_{WC}} & \frac{\partial h_{ij}}{\partial \omega_C} & \dots & \frac{\partial h_{ij}}{\partial \mathbf{y}_i} & \dots \end{bmatrix}. \quad (24)$$

The jacobian of the measurement model for the camera orientation,  $\frac{\partial h_{ij}}{\partial \mathbf{q}_{WC}}$ , is derived using Eq. (7) and (10) as

$$\frac{\partial h_{ij}}{\partial \mathbf{q}_{WC}} = \begin{bmatrix} \frac{\partial h_{ij}}{\partial q_1} & \frac{\partial h_{ij}}{\partial q_2} & \frac{\partial h_{ij}}{\partial q_3} & \frac{\partial h_{ij}}{\partial q_4} \end{bmatrix}, \quad (25)$$

where

$$\frac{\partial h_{ij}}{\partial q_1} = 2\mathbf{d}_i^T \begin{bmatrix} q_1 & -q_4 & q_3 \\ q_4 & q_1 & -q_2 \\ -q_3 & -q_2 & q_1 \end{bmatrix} \mathbf{n}_{ij}, \quad (26)$$

$$\frac{\partial h_{ij}}{\partial q_2} = 2\mathbf{d}_i^T \begin{bmatrix} q_2 & q_3 & q_4 \\ q_3 & -q_2 & -q_1 \\ q_4 & -q_1 & -q_2 \end{bmatrix} \mathbf{n}_{ij}, \quad (27)$$

$$\frac{\partial h_{ij}}{\partial q_3} = 2\mathbf{d}_i^T \begin{bmatrix} -q_3 & q_2 & q_1 \\ q_2 & q_3 & q_4 \\ -q_1 & q_4 & -q_3 \end{bmatrix} \mathbf{n}_{ij}, \quad (28)$$

$$\frac{\partial h_{ij}}{\partial q_4} = 2\mathbf{d}_i^T \begin{bmatrix} -q_4 & -q_1 & q_2 \\ q_1 & -q_4 & q_3 \\ q_2 & q_3 & q_4 \end{bmatrix} \mathbf{n}_{ij}. \quad (29)$$

The jacobian of the measurement model for the angular velocity,  $\frac{\partial h_{ij}}{\partial \omega_C}$ , is a 3-dimensional row vector with all elements equal to zero, since the measurement model does not involve the variables of the angular velocity. The jacobian of the measurement model for the  $i$ -th VD,  $\frac{\partial h_{ij}}{\partial \mathbf{y}_i}$ , is derived as

$$\frac{\partial h_{ij}}{\partial \mathbf{y}_i} = \frac{\partial h_{ij}}{\partial \mathbf{d}_i} \frac{\partial \mathbf{d}_i}{\partial \mathbf{y}_i}, \quad (30)$$

where the left jacobian of the right term,  $\frac{\partial h_{ij}}{\partial \mathbf{d}_i}$ , is computed using Eq. (7), as

$$\frac{\partial h_{ij}}{\partial \mathbf{d}_i} = (\mathbf{R}(\mathbf{q}_{WC})\mathbf{n}_{ij})^T, \quad (31)$$

and the right jacobian of the right term,  $\frac{\partial \mathbf{d}_i}{\partial \mathbf{y}_i}$ , is computed using Eq. (8), as follows.

$$\frac{\partial \mathbf{d}_i}{\partial \mathbf{y}_i} = \begin{bmatrix} -\cos \phi_i \sin \theta_i & -\sin \phi_i \cos \theta_i \\ \cos \phi_i \cos \theta_i & -\sin \phi_i \sin \theta_i \\ 0 & \cos \phi_i \end{bmatrix} \quad (32)$$

When computing the jacobian  $\frac{\partial h_{ij}}{\partial \mathbf{x}_v}$ , all the jacobians  $\frac{\partial h_{kl}}{\partial \mathbf{y}_k}$  except for  $k = i$  and  $l = j$  are 2-dimensional row vectors with all elements equal to zero.

## References

- [1] D. Simon. *Optimal State Estimation: Kalman, H Infinity, and Nonlinear Approaches*. Wiley-Interscience, Hoboken (N.J.), 2006.
